# Supplementary material for: Is age at puberty associated with semen quality and reproductive hormones in young adult life?
Source: PubMed Central journal article supplement — Asian J Androl. 2016 Nov 4;19(6):625–32. doi: 10.4103/1008-682X.190328 (PMC5676420; doi:10.4103/1008-682x.190328), 2016-11-04
Supplement: AJA-19-625_Suppl1.pdf [file AJA-19-625_Suppl1.pdf]

**Supplementary Table 1: Crude median semen quality and reproductive hormone parameters according to age at indicators of pubertal development, imputed dataset (n=320)**

| Age groups in years        | Distribution (%) | Sperm concentration (million ml <sup>-1</sup> ) | Semen volume (ml) | Sperm total count (million) | Motile sperm (%)     | Normal morphology sperm (%) | DNA damage (%)     | Testosterone (nmol l <sup>-1</sup> ) | Estradiol (nmol l <sup>-1</sup> ) | FSH (IU l <sup>-1</sup> ) | LH (IU L <sup>-1</sup> ) | SHBG (nmol l <sup>-1</sup> ) | Inhibin B (pg ml <sup>-1</sup> ) |
|----------------------------|------------------|-------------------------------------------------|-------------------|-----------------------------|----------------------|-----------------------------|--------------------|--------------------------------------|-----------------------------------|---------------------------|--------------------------|------------------------------|----------------------------------|
| First nocturnal emission   |                  |                                                 |                   |                             |                      |                             |                    |                                      |                                   |                           |                          |                              |                                  |
| <13                        | 31               | 39.6<br>(21.4; 86.0)                            | 2.7<br>(2.1; 3.7) | 116.4<br>(48.7; 248.2)      | 70.0<br>(62.0; 77.0) | 5.0<br>(2.5; 8.5)           | 8.4<br>(5.6; 10.5) | 17.3<br>(14.5; 21.0)                 | 0.1<br>(0.1; 0.1)                 | 2.9<br>(2.1; 3.7)         | 4.8<br>(3.5; 5.7)        | 26.6<br>(20.2; 33.9)         | 164.0<br>(135.0; 190.0)          |
| 13–14                      | 30               | 48.0<br>(22.9; 90.0)                            | 3.1<br>(2.0; 4.0) | 137.4<br>(55.0; 281.3)      | 69.0<br>(60.0; 75.0) | 5.5<br>(3.5; 8.5)           | 8.1<br>(5.7; 12.0) | 16.5<br>(14.2; 19.7)                 | 0.1<br>(0.1; 0.1)                 | 2.9<br>(2.2; 4.1)         | 4.0<br>(3.0; 5.0)        | 26.9<br>(19.9; 33.8)         | 155.0<br>(115.0; 180.0)          |
| >14–15                     | 22               | 31.2<br>(14.2; 78.8)                            | 2.8<br>(2.3; 3.9) | 112.9<br>(34.1; 223.4)      | 71.0<br>(61.0; 78.0) | 6.0<br>(3.0; 8.0)           | 8.3<br>(5.4; 11.0) | 16.5<br>(12.7; 19.4)                 | 0.1<br>(0.1; 0.1)                 | 3.1<br>(2.0; 4.5)         | 4.2<br>(3.3; 5.3)        | 25.2<br>(19.4; 32.5)         | 150.0<br>(113.0; 185.0)          |
| >15                        | 17               | 30.6<br>(18.4; 75.5)                            | 3.0<br>(2.0; 3.8) | 94.4<br>(44.5; 204.4)       | 72.0<br>(65.0; 78.0) | 5.0<br>(3.0; 8.0)           | 9.2<br>(6.3; 11.9) | 16.7<br>(12.4; 20.8)                 | 0.1<br>(0.1; 0.1)                 | 3.0<br>(2.1; 5.0)         | 4.2<br>(3.1; 5.5)        | 25.0<br>(18.7; 37.7)         | 135.0<br>(100.0; 180.0)          |
| Start of pubic hair growth |                  |                                                 |                   |                             |                      |                             |                    |                                      |                                   |                           |                          |                              |                                  |
| <13                        | 29               | 48.5<br>(22.8; 100.0)                           | 2.6<br>(2.1; 3.7) | 132.5<br>(56.6; 281.3)      | 69.0<br>(60.0; 76.0) | 5.5<br>(3.0; 8.5)           | 8.3<br>(5.9; 10.7) | 16.9<br>(15.0; 20.6)                 | 0.1<br>(0.1; 0.1)                 | 2.9<br>(2.2; 3.6)         | 4.5<br>(3.6; 5.6)        | 27.5<br>(19.9; 34.6)         | 155.0<br>(122.0; 182.0)          |
| 13–14                      | 33               | 43.4<br>(20.2; 84.8)                            | 3.0<br>(2.0; 4.0) | 125.6<br>(45.8; 248.4)      | 70.0<br>(60.0; 78.0) | 6.0<br>(3.0; 8.5)           | 8.2<br>(5.7; 11.4) | 16.3<br>(12.3; 19.4)                 | 0.1<br>(0.1; 0.1)                 | 3.0<br>(2.2; 4.4)         | 4.5<br>(3.3; 5.6)        | 26.6<br>(20.3; 34.9)         | 153.0<br>(109.0; 180.0)          |
| >14–15                     | 23               | 36.8<br>(20.1; 86.0)                            | 2.9<br>(2.3; 3.9) | 114.6<br>(50.2; 264.9)      | 72.0<br>(65.0; 78.0) | 6.0<br>(3.0; 8.5)           | 8.6<br>(5.9; 11.6) | 16.1<br>(13.0; 19.1)                 | 0.1<br>(0.1; 0.1)                 | 3.1<br>(2.1; 4.2)         | 3.9<br>(3.1; 5.2)        | 26.2<br>(19.9; 32.5)         | 155.0<br>(118.0; 188.0)          |
| >15                        | 15               | 24.6<br>(16.5; 53.0)                            | 3.0<br>(2.2; 3.9) | 81.5<br>(36.5; 186.3)       | 70.0<br>(62.0; 77.0) | 4.5<br>(3.0; 6.5)           | 8.6<br>(5.5; 11.9) | 17.0<br>(14.0; 21.1)                 | 0.1<br>(0.1; 0.1)                 | 2.8<br>(1.9; 4.8)         | 4.0<br>(2.7; 5.1)        | 23.9<br>(18.3; 32.4)         | 145.0<br>(115.0; 185.0)          |
| First voice break episode  |                  |                                                 |                   |                             |                      |                             |                    |                                      |                                   |                           |                          |                              |                                  |
| <13                        | 16               | 42.5<br>(22.8; 92.8)                            | 2.7<br>(2.2; 3.7) | 120.7<br>(56.6; 276.6)      | 70.0<br>(62.0; 77.0) | 4.5<br>(3.0; 7.5)           | 8.5<br>(5.5; 11.3) | 16.9<br>(14.8; 22.1)                 | 0.1<br>(0.1; 0.1)                 | 2.8<br>(2.0; 3.5)         | 4.7<br>(3.8; 5.7)        | 28.6<br>(20.6; 35.5)         | 162.0<br>(126.0; 184.0)          |
| 13–14                      | 28               | 47.1<br>(20.5; 89.3)                            | 3.0<br>(2.1; 4.1) | 141.8<br>(45.8; 275.3)      | 71.0<br>(61.0; 78.0) | 5.5<br>(3.0; 8.5)           | 8.9<br>(6.3; 12.0) | 17.3<br>(14.5; 19.8)                 | 0.1<br>(0.1; 0.1)                 | 2.9<br>(2.2; 4.1)         | 4.2<br>(3.3; 5.4)        | 24.9<br>(19.0; 35.0)         | 156.0<br>(118.0; 187.0)          |
| >14–15                     | 27               | 33.3<br>(20.4; 78.0)                            | 3.0<br>(2.2; 4.0) | 114.6<br>(49.4; 209.5)      | 69.0<br>(60.0; 77.0) | 6.0<br>(3.0; 9.0)           | 7.8<br>(5.4; 10.5) | 15.7<br>(12.9; 18.6)                 | 0.1<br>(0.1; 0.1)                 | 3.0<br>(2.2; 4.6)         | 4.2<br>(3.2; 5.6)        | 26.6<br>(20.3; 33.3)         | 152.0<br>(117.0; 180.0)          |
| >15                        | 29               | 32.2<br>(20.1; 79.8)                            | 2.7<br>(2.1; 3.7) | 94.4<br>(43.7; 217.8)       | 70.0<br>(62.0; 77.0) | 5.0<br>(3.0; 8.0)           | 8.6<br>(5.5; 11.6) | 17.5<br>(14.8; 21.0)                 | 0.1<br>(0.1; 0.1)                 | 3.0<br>(2.1; 4.2)         | 4.0<br>(2.8; 5.2)        | 24.7<br>(19.4; 32.5)         | 147.0<br>(112.0; 185.0)          |

FSH: follicle-stimulating hormone; LH: luteinizing hormone; SHBG: sex hormone binding globulin
